# Supplementary material for: Increased Yield of Extracellular Vesicles after Cytochalasin B Treatment and Vortexing
Source: MDPI journal article supplement (doi:10.3390/cimb45030158), 2023-03-15
Supplement: s1 [file s1]

# Supplementary materials:

## Increased Yield of Extracellular Vesicles after Cytochalasin B Treatment and Vortexing

Sirina V. Kurbangaleeva, Valeriia Y. Syromiatnikova, Angelina E. Prokopeva, Aleksey M. Rogov, Artur A. Khannanov, Albert A. Rizvanov and Marina O. Gomzikova \*

### 1. DLS analysis

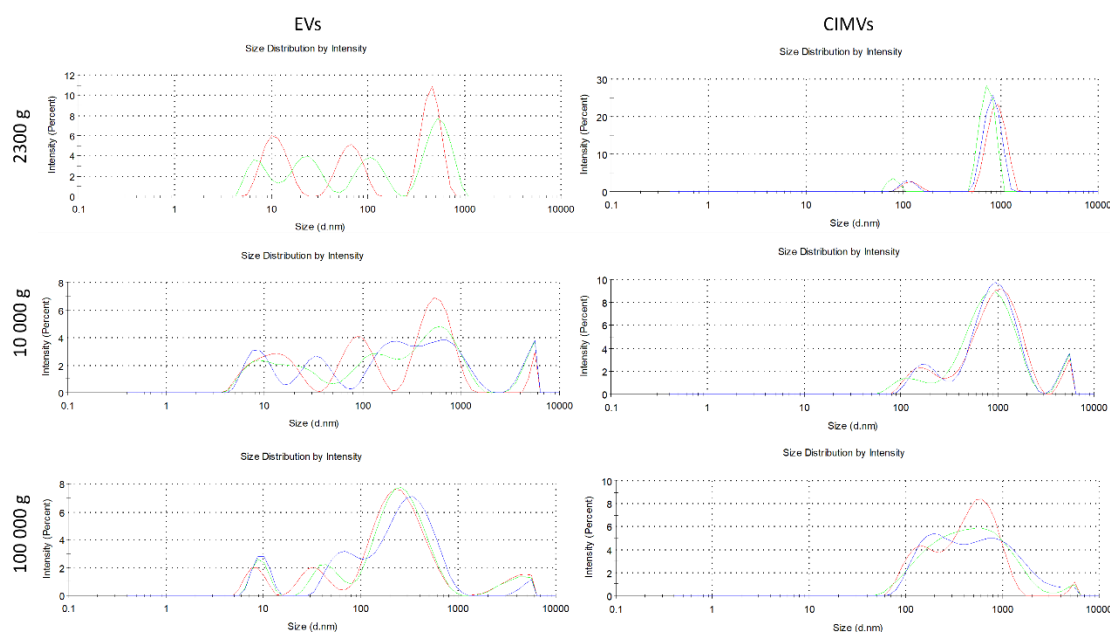

**Figure S1.** Dynamic light scattering profiles of EVs and CIMVs.

**Citation:** Kurbangaleeva, S.V.;  
Syromiatnikova, V.Y.; Prokopeva,  
A.E.; Rogov, A.M.; Khannanov, A.A.;  
Rizvanov, A.A.; Gomzikova, M.O.  
Increased Yield of Extracellular  
Vesicles after Cytochalasin B  
Treatment and Vortexing. *Curr.*  
*Issues Mol. Biol.* **2023**, *3*, x.  
<https://doi.org/10.3390/xxxxx>

Academic Editors: Gerhard Breves

Received: 23 November 2022

Revised: 7 March 2023

Accepted: 13 March 2023

Published: 15 March 2023

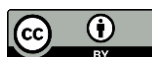

**Copyright:** © 2023 by the authors.  
Submitted for possible open access  
publication under the terms and  
conditions of the Creative Commons  
Attribution (CC BY) license  
(<https://creativecommons.org/licenses/by/4.0/>).

## 2. Impact of cytochalasin B treatment on phenotype of adherent MSCs

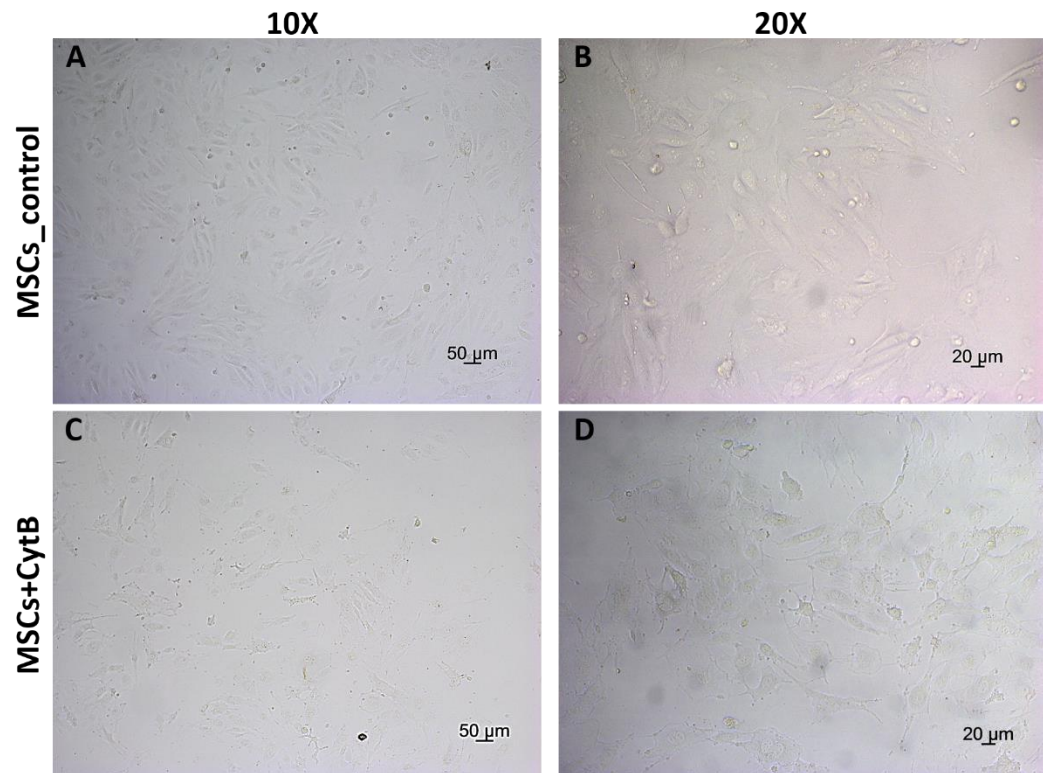

**Figure S2.** Analysis of phenotype of native mouse MSCs (A,B) or treated with cytochalasin B for 30 min (C,D). Light microscopy AxioObserver.Z1 (Carl Zeiss, USA). Magnification 10X (A,C) and 20X (B,D).

### 3. Impact of cytochalasin B treatment and vortexing on MSCs viability.

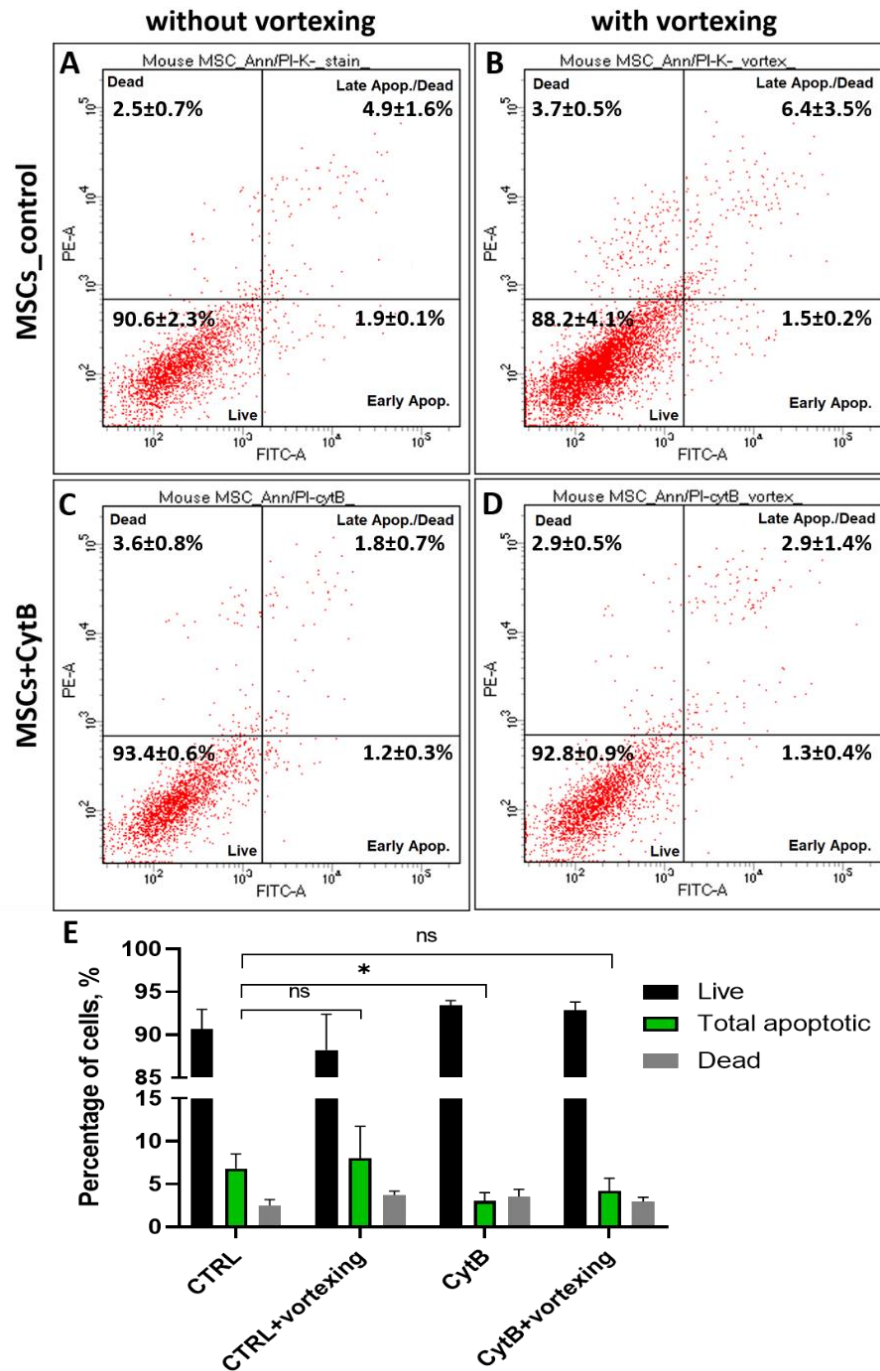

**Figure S3.** Dot plots depicting native mouse MSCs (A,B) and after 30 min incubation with cytochalasin B (C,D) analyzed by flow cytometry BD FACS Aria III (BD Bioscience, USA). Analysis of percentage of live (black), apoptotic (green) and dead (gray) MSCs (E). ns—not statistically significant. (\*)—level of significance  $p < 0.05$ .

#### 4. Effect of cytochalasin B treatment and vortexing on MSCs phenotype in suspension

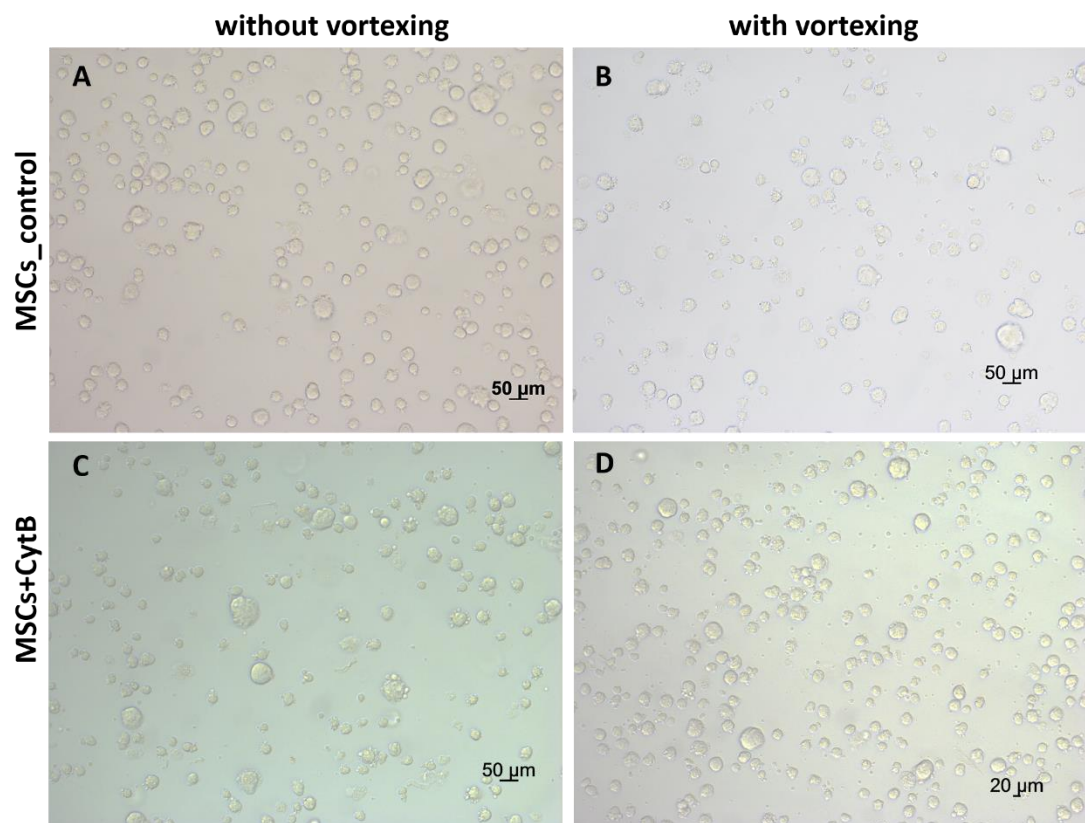

**Figure S4.** Analysis of mouse MSCs phenotype in suspension: native MSCs (A,B) and after 30 min incubation with cytochalasin B (C,D). Light microscopy AxioObserver.Z1 (Carl Zeiss, USA). Magnification 20X.
